## Long-title:

Survey evaluation of dog owners' feeding habits in a household setting and comparison of FDA hygiene protocols on dog bowl bacterial contamination as evaluated by total aerobic cell counts.

## Short-title:

Evaluation of Dog Owners' Feeding Protocols and Influence of Specific Hygiene Protocols

## Author list:

Emily Luisana<sup>1¶#a\*</sup>, Korinn Saker<sup>1¶</sup>, Lee-Ann Jaykus<sup>2&</sup>, Caitlyn Getty<sup>1&#b</sup>

<sup>1</sup> Department of Molecular Biomedical Sciences, College of Veterinary Medicine, North Carolina State University, Raleigh, NC USA

<sup>2</sup> Department of Food, Bioprocessing and Nutrition Sciences, North Carolina State University, Raleigh, NC USA

<sup>#a</sup>BluePearl Veterinary Specialty Hospital, Cary, NC, USA

<sup>#b</sup>NomNomNow Inc, Nashville, TN USA

\*Corresponding author

[ektownse@gmail.com](mailto:ektownse@gmail.com)

¶ These authors contributed equally to the work

& These authors also contributed equally to the work

The author(s) received no specific funding for this work.

## 27 **Abstract**

28  
29 In-home pet food handling and food dish hygiene practices can have adverse health impacts for both humans and  
30 pets. Safe food and dish handling guidelines are not easily evidenced for pet owners. The study was designed to  
31 investigate dog owners' feeding habits and evaluate the impact of the Food and Drug Association (FDA) hygiene  
32 protocols on dog food dish contamination. Procedures and surveys were approved by NCSU-IACUC and -IRB. Pet  
33 feeding and food dish hygiene data were collected from 417 dog owner surveys and 68 food dish swabs. Total  
34 aerobic cell counts (TAC) were performed on 68 dishes and randomly assigned into Group A (FDA pet food  
35 handling and dish hygiene guidelines), Group B (FDA pet and human food handling and dish hygiene guidelines), or  
36 Group C (no guidelines). Hygiene protocols were instituted in-home for 1 week, followed by a second TAC and  
37 follow-up survey. Survey from dog owners-households indicated: 4.7% were aware of FDA pet food handling and  
38 dish hygiene guidelines; 36% have individuals  $\leq 13$  years old and/or immunocompromised; 43% store dog food 0-5  
39 feet from human food; 34% wash their hands after feeding; and 33% prepare their dog food on human food  
40 preparation surfaces. The hygiene protocols followed by Groups A and B resulted in significant decreases in food  
41 dish TAC ( $P < 0.001$ ; 1.40;  $p = 0.026$ ; 0.604, respectively), as compared to Group C ( $p = 0.373$ ). Hot water ( $> 160^\circ\text{F}$ )  
42 washing decreased TAC ( $p = 0.005$ ) over cold/lukewarm water. In the follow-up survey, 8% of Group A and B  
43 respondents reported likely to adhere to protocols long-term. This study suggests a need for pet food handling and  
44 dish hygiene guideline education to minimize bacterial contamination of dishes, especially in high-risk households.

45

## 46 **Introduction**

47

48 The Centers for Disease Control and Prevention (CDC) One Health initiative, which highlights the interconnection  
49 between humans, animals and the environment, has been a prevalent focus in the scientific and lay literature of late.  
50 The aim of One Health is ultimately to achieve optimal health outcomes for all involved in these interactions(1).  
51 Food safety-related concerns are one aspect of One Health that span contamination of human and animal foodstuffs  
52 as well as equipment and environment hygiene practices involved in food handling. Certainly, human food safety is  
53 paramount to human wellness; correspondingly, emphasis on benefits of enhancing the human-animal bond invites

54 One Health concerns for pet food safety. The actual act of feeding a pet generally entails interplay between the pet,  
55 the owner, and the food. This interaction creates the opportunity for mutual exchange of microbial contaminants  
56 from food or water, dishes, and the food storage or preparation environment, which can cause health consequences  
57 for both humans and pets.

58

59 Drug resistant *Escherichia coli* has been demonstrated to be present on pets, humans, and the pets' food dish in  
60 affected households(2). A 2006 study examining microbial contamination, measured by total aerobic cell counts, of  
61 daily use objects in households found that pet food dishes had the ninth highest level of contamination, out of 32  
62 household surfaces studied(3). This study also cultured for medically important bacterial species: methicillin-  
63 sensitive *Staphylococcus aureus* (MSSA, found in 15% of pet food dishes sampled), methicillin-resistant  
64 *Staphylococcus aureus* (MRSA, 3%), coagulase-negative *Staphylococcus spp* (74%), *Pseudomonads* (18%), and  
65 *Enterobacteriaceae* (36%). In 2010, Weese and co-workers isolated *Clostridium difficile* in 6 of 84 dog food dishes  
66 making it one of the second most contaminated sites of those sampled, ranking higher than surfaces commonly  
67 considered to have high bacterial loads such as the toilet(4). More recently, a 2012 study also examining total  
68 aerobic counts on household surfaces showed that pet water dishes had the third highest bacterial counts out of 26  
69 surfaces studied. When categorized into areas of the household, the category of pet-related items (which comprised  
70 the water dish and a pet toy) had the highest bacterial counts(5). These studies corroborate the concern of dog dishes  
71 being a potential source of microbial contamination in a household setting.

72

73 Despite the concern for contamination, few guidelines for pet dish hygiene exist and those guidelines are not easily  
74 accessed or widely distributed. The Food and Drug Administration (FDA) has pet dish cleaning recommendations  
75 available via their website in combination with general pet food handling guidelines(6), but in comparison to their  
76 guidelines for human dishes in the FDA Food Code 2017(7), the pet information is sparse and vague. In addition, no  
77 studies examining the effects of the FDA's recommendations on pet dish hygiene were found by the authors.

78 Therefore, the goals of the study were to assess: dog owner's awareness of FDA pet food handling and feeding dish  
79 hygiene guidelines; pet food and dish handling habits of pet owners; and evaluate the degree of dog bowl bacterial  
80 contamination before and after the institution of the FDA pet food guidelines and FDA Food Code guidelines.

81

## 82 **Materials and Methods**

83

### 84 **Survey study design -**

85 Study procedures were approved by the North Carolina State University's Institutional Animal Care and Use  
86 Committee (IACUC protocol number 19-542) and Institutional Review Board (IRB protocol number 23476).  
87 Study participants were dog owners recruited from local veterinary practices, social media, and university veterinary  
88 school staff and faculty. Recruitment criteria included owning at least one dog who eats from a designated food  
89 bowl. An incentive in the form of a dog food donation to a local shelter for each participant was offered. The  
90 approximately 20-minute survey was powered by Qualtrics and developed with assistance of an experienced  
91 psychometrician. The survey was developed to obtain information regarding their pet's signalment, health status,  
92 and diet. Additionally, information was obtained regarding the extent of each pet owner's knowledge of current  
93 FDA-published pet food handling and food bowl hygiene guidelines and the specific food handling and bowl  
94 hygiene habits practiced at home for their dog(s). Owners were requested to complete one survey per dog with a  
95 maximum of two surveys per family. A total of 417 surveys were returned. Qualtrics surveys were evaluated via  
96 internal software for means and tabulated breakdown.

97

### 98 **Evaluating food bowl bacterial contamination -**

99 The impact of following specific food handling and food bowl hygiene protocols on food bowl contamination risk  
100 was evaluated using a subset of the survey participants. From the survey participants, owners of 68 dogs (a total of  
101 50 owners) were invited to complete a food bowl bacterial contamination study. To minimize bias, prior to survey  
102 distribution to these 50 dog owners, a baseline food bowl swab was obtained, then owners were asked to complete  
103 the Qualtrics survey. Participants were then randomly assigned to three treatment groups. Treatment group A  
104 (n=27) were instructed to follow the FDA's Tips for Safe Handling of Pet Food and Treats(6) (last update 7/9/2019  
105 at the time of study). Specifically, they were requested to: wash their hands before and after handling pet food, to not  
106 use their dog food bowl as a food scooping utensil, wash the bowl and scooping utensils with soap and hot water  
107 after each use, discard uneaten food in a designated manner and store dry pet food in its original bag. Treatment

108 group B (n=30) were given the FDA's Tips for Safe Handling of Pet Food and Treats and more stringent  
109 instructions extrapolated from the FDA's Food Code 2017(7) to specify that handwashing should be at least 20  
110 seconds and with warm water and soap, food dishes should be scraped of food prior to washing, that dishwashing  
111 should be with water >160° F and soap for at least 30 seconds and dried thoroughly with a clean towel or put  
112 through an NSF-certified dishwasher for a wash and dry cycle. Treatment group C (n=11) were given no specific  
113 instructions regarding food and or bowl handling but informed of the second sample collection time. Owners were  
114 asked to follow the specific protocol until the second bacterial swab of the pet's food bowl was obtained (average of  
115 8 days following pre-protocol sample). A follow-up survey was sent to Groups A and B regarding their compliance  
116 and impression of the given instructions. The group C follow-up survey focused on their food bowl washing  
117 behavior since the baseline sample was taken.

118  
119 To obtain the food bowl swabs for evaluation of bacterial contaminants, bowls were fitted with a measured SKC  
120 Incorporated 10 cm<sup>2</sup> environmental sampling template to allow for accurate cell counts. If bowls were too small for  
121 the standard template the contact surface area was measured. A sterile swab, saturated in 4 mL of Butterfields  
122 solution (Puritan ESK pre-filled Environmental Sampling Kit), was systematically rolled across the bowl surface  
123 surrounded by the template, then placed back into the solution and sealed for proper handling. Samples were kept on  
124 ice and plated on aerobic cell count Petrifilm (3M Nelson Jameson Company) within 24 hours of collection.  
125 Samples were plated at 0, 1:10, 1:100, and 1:1000 dilutions. Swab sampling and plating was performed by one  
126 investigator and repeated at the end of the treatment period. Post samples for Groups A and B were plated at 0 and  
127 1:10 dilutions only based on suspected contamination level post-treatment and the results of a pilot study. Following  
128 manufacturer's instructions, the Petrifilm was incubated for 48 hours +/- 1 hour at 32° C. Total aerobic cell counts  
129 (TAC) were then read manually and results were adjusted to account for sample surface area on the-basis of colony  
130 forming units per cm squared (cm<sup>2</sup>). TAC results were evaluated using R version 3.6.2. For log-scale analyses, all  
131 raw values were increased by 0.01 to allow the logarithm transformation to be applied to the 0 values. Additionally,  
132 the logarithm with base 10 ( $\log_{10}$ ) was used for the transformation. For percent reduction evaluations, observations  
133 with a 0-value for the pre-value were excluded (2 of 68 observations) due to percent change from 0 not being  
134 defined. Predictive models of the change in log-transformed cell counts were examined with linear regression and  
135 Kruskal-Wallis tests. T-tests were performed within groups to compare pre- and post-treatment values.

136

## 137 **Results**

138

### 139 **Survey-**

140 A total of 417 surveys were returned. As not all questions were required, there was a range in total responses to  
141 individual questions. There was a broad dog demographic represented in this study as reported by survey responses  
142 from dog owners. Reported age ranged from < 12 months to 16 years with an average of 7 years. Gender distribution  
143 was as follows: spayed female (43%), neutered male (41%), male intact (11%), female intact (5%). The majority  
144 (44%) reported breed as mixed or 'other' breed. The most popular purebred dog reported was a Labrador Retriever  
145 at 9%, followed by German Shepherd Dog at 4%. Weight distribution was as follows: 1-10 pounds (5%), 11-25  
146 pounds (20%), 26-50 pounds (25%), 51-75 pounds (29%), 76-100 pounds (16%), 101+ pounds (5%). The majority  
147 of respondents (76%) reported their dogs as healthy whereas 24% reported a history of illness: gastrointestinal-  
148 related food allergies (7%), dental disease (6%), obesity (5%), pancreatitis (2%), less than 2% each: liver disease,  
149 bladder stones, kidney disease and unspecified neoplasia.

150

151 A minority, less than 5%, of respondents were aware of the existence of FDA pet food handling guidelines.  
152 However, when asked where they expected to find this information, 8% replied the FDA, 41% the food label, 28%  
153 their veterinarian, 11% the store of purchase, 6% the USDA and 6% various websites. Table 1 summarizes the dog  
154 owner compliance in our study. Higher levels of compliance (>75%) were found for: inspecting packaging for  
155 visible damage, avoiding use of the food bowl as a scooping utensil, tightly covering leftover pet food, discarding  
156 food in a way a pet cannot access, and avoiding raw food. Lower levels of compliance (>25%) were found for:  
157 washing hands as recommended prior to handling pet food, washing the food dish as recommended after each use,  
158 and washing the food scoop as recommended after each use.

159

160 **Table 1: FDA Pet Food Handling Recommendation and Owner Reported Compliance**

| FDA Pet Food Handling Recommendation | Owner Reported Compliance |
|--------------------------------------|---------------------------|
|--------------------------------------|---------------------------|

|                                                                                          |                                                                   |
|------------------------------------------------------------------------------------------|-------------------------------------------------------------------|
| Inspect for visible damage                                                               | 86% yes                                                           |
| Wash hands with soap and hot water for at least 20 seconds <i>prior</i> to handling      | 22% yes                                                           |
| Do not use bowl as scooping utensil                                                      | 91% no                                                            |
| Wash pet food <i>dish</i> with soap and hot water after each use                         | 50% with hot/water or dishwasher<br>12% wash at least once daily  |
| Wash <i>scoop/utensil</i> with soap and hot water for at least 20 seconds after each use | 13% yes                                                           |
| Wash hands with soap and hot water <i>after</i> handling                                 | 38% yes                                                           |
| Store food in original bag                                                               | 30% yes (including those who put whole bag into larger container) |
| Tightly cover leftover food                                                              | 81% yes (dry food)<br>57% yes (canned food)                       |
| Discarding food in a way pet cannot access                                               | 96% yes                                                           |
| Do not feed raw food                                                                     | 97% yes                                                           |

161

162

163

164

**Table 2: Additional Survey Questions**

| <b>Additional Survey Questions</b>              | <b>Owner Response</b>                                                                                                                                                                        |
|-------------------------------------------------|----------------------------------------------------------------------------------------------------------------------------------------------------------------------------------------------|
| Where do you typically prepare your dog's food? | 32%: On a surface used for human food preparation<br>39% Not on a surface used for human food preparation, but in the same room<br>29% In a different room from where human food is prepared |

|                                                                                                                                           |                                                                                                                                                                                                        |
|-------------------------------------------------------------------------------------------------------------------------------------------|--------------------------------------------------------------------------------------------------------------------------------------------------------------------------------------------------------|
| When you wash your pet's food dish, do you wash it in the same sink/dishwasher used for human dishes?                                     | <p>43% Yes, it is washed with human dishes</p> <p>49% Yes, although it is washed separately from human dishes</p> <p>8% No, it is washed in a different sink/dishwasher than used for human dishes</p> |
| Where do you typically keep your dog food dish?                                                                                           | <p>96% indoors</p> <p>4% outdoors</p>                                                                                                                                                                  |
| If you had questions regarding how to handle or store your pet's food, where would you expect to find guidelines? (choose all that apply) | <p>41% the pet food label</p> <p>28% your veterinarian</p> <p>11% place of purchase</p> <p>8% FDA</p> <p>6% USDA</p> <p>6% other (most popular fill in answer: internet searches)</p>                  |

165

166 The majority of respondents (22%) reported washing their dish, on average once weekly. However, there was a wide  
 167 distribution of responses with 12% washing their dish at least once daily to 18% reporting they wash their dish either  
 168 less than every 3 months or not at all.

169

170 When respondents did wash their bowl, it was most often with soap and warm water (defined as 100-159°F, 36%)  
 171 followed by the dishwasher (33%), soap with hot water ( $\geq 160^\circ\text{F}$ , 17%), rinsing with water only (6%), soap with cool  
 172 water (5%) with the remainder (<3%) reporting undefined average protocols. Most reported allowing their dish to air  
 173 dry (44%), followed by hand-drying with a towel (32%), heated dry in a dishwasher (22%) and a smaller percentage  
 174 used a non-heated dry in a dishwasher (<3%). When washing their pet food bowl, 43% washed the food dish in a  
 175 sink/dishwasher alongside human dishes, 49% washed in the same sink/dishwasher used for human dishes but at a  
 176 separate time, and 8% reported washing it in a different sink/dishwasher than used for human dishes (Table 2). The  
 177 majority of respondents (65%) remove dry dog food from the manufacturer's bag for storage. Most respondents  
 178 (81%) felt that they typically tightly closed or sealed the bag/container in which the kibble is stored. Of those that  
 179 fed canned food, most (61%) stored leftover food in the can, and (57%) reported using an airtight cover.



180

181 Other results of potential public health interest were not directly related to FDA recommendations. Roughly one-  
182 third (32%) of respondents reported preparing their pet's food on a surface used for human food preparation and  
183 39% reported preparation occurred not on the same surface but in the same room (Table 2). Regarding pet food  
184 storage, 44% reported storing dog food 0-5 feet from human food. Questions pertaining to the human population of  
185 the household found that 35% stated they have children <12 years old and/or immunocompromised individuals in  
186 the household. The vast majority (96%) reported typically keeping the food bowl indoors (Table 2).

187

188 Respondents were asked about the percentages of the food type placed in their dog bowl during an average 24-hour  
189 period (Fig 1). The TAC group was a relatively accurate reflection of the overall group as the majority (91% and  
190 90% respectively) reported kibble with 5% of each reporting canned food. A smaller number of respondents in both  
191 groups used other categories such as cooked homemade food 2.5, 2.7 (3%), raw commercial food 1.34, 0.5% (1%),  
192 and raw non-commercial food 1.54 (<1% and 3%, TAC and overall, respectively). Within the 3% of the overall  
193 group who reported raw non-commercial food, 25% noted they fed raw meat or eggs, 49% raw vegetables, 15% raw  
194 fruit, and 3% raw dairy. The bowl material for each group was also comparable (Fig 2) with the majority of each  
195 group being metal (64% and 74% of all respondents and TAC participants, respectively), followed by plastic (19%,  
196 16%), ceramic (16%, 10%) and ~1% of both groups reporting glass or other materials. Of the overall group, 9%  
197 reported adding supplements or medications into their pets' food bowls within the past 24 hours.

198

### 199 **Figure 1: Food type used in average 24-hour period**

200 Comparison of food type between all survey respondents and respondents of those participating in the TAC  
201 assessment

202

### 203 **Figure 2: Food bowl material**

204 Comparison of bowl type between all survey respondents and respondents of those participating in the TAC  
205 assessment

206

## 207 **Bacterial Contamination Evaluation-**

208 As is common with total aerobic counts (TAC), there was a wide range in values, therefore data was examined on a  
209 log<sub>10</sub> scale. Differences were found within groups A and B for TAC between the pre- and post-treatments. Group C  
210 showed no significant change in TAC from the initial to the final bowl swab for TAC. (Fig 3).

211

212 **Figure 3: Comparison of the Total Aerobic Counts in Studied Dog Bowls Pre- and Post- hygiene treatment**

213 TAC on a basis of colony forming units (CFUs) per cm<sup>2</sup> of studied bowls pre- and post-hygiene treatment

214 Superscripts that differ within a group indicated significant difference ( $p < 0.05$ ). Similar superscripts across groups

215 indicate no significant difference ( $p < 0.05$ ).

216

217 A significant decrease in TAC was observed between pre- and post-bowl hygiene treatments in both Groups A  
218 (1.48,  $p < 0.001$ ) and B (0.604,  $p = 0.042$ ). Whereas group C showed a non-significant ( $p = 0.373$ ) increase in TAC  
219 (Table 3). Once data was corrected for multiple testing, no significant difference ( $p = 0.026$ ) was noted when  
220 comparing the absolute quantitative decrease in TAC between pre- and post-treatment for group A vs group B. To  
221 address the observation that a wide range of TAC values were counted in bowls pre-hygiene treatment, we evaluated  
222 the TAC changes from the perspective of split levels (low= $\leq 20$  CFUs, medium= $20-100$  CFUs and high= $\geq 100$   
223 CFUs) based on the pre-treatment contamination values. This further delineation did not show a significant  
224 difference in post-measurements across groups A and B ( $p = 0.240$ ). In addition, utilizing a linear regression model,  
225 no difference in post-treatment TAC values was found based on pre-contamination levels ( $p = 0.434$ ).

226

227 Bowl material did not have a significant effect on CFU values of the aerobic bacteria detectable by our TAC  
228 technique prior to initiating any food bowl hygiene treatment ( $p = 0.359$ ). As well, no significant change in TAC was  
229 noted in treatment groups A and B ( $p = 0.642$ ) following the specified hygiene treatment. Additionally, the pre-  
230 treatment aerobic bacterial counts did not differ based on the presence of immunocompromised individuals or  
231 children in the household ( $p = 0.599$  and  $p = 0.496$ , respectively).

232 The follow up survey was completed by 90% of TAC participants. Only 8% of Group A and B respondents reported  
233 likely to adhere to all of the instructed protocols long-term. This included handwashing, dishwashing, and food  
234 storage guidelines. Whereas 20% reported likely to follow only their given washing instructions long-term. Group C  
235 participants were not given instructions, however; none had washed their bowl since the first sample was taken. No

236 significant differences were found between groups A and B in the self-reported likelihood of continuing all  
237 instructions ( $p=0.577$ ) or washing instructions ( $p=0.722$ ).

238

239 A statistical model fitted to enable the prediction of the log-change, which included the last wash and last dry as  
240 predictors, indicated that a significant difference, reflective of TAC, was observed between cold/lukewarm wash and  
241 FDA recommended methods (dishwasher or hot water wash). The difference was a decrease of 1.52 units on the log  
242 scale ( $p=0.005$ ) for TAC following a hot water wash or dishwasher as compared to a cold/lukewarm water wash.

243 No significant effect of the drying method was found within or across any treatment group ( $p=0.234$ ).

244

## 245 **Discussion**

246

247 It was found that the vast majority of study dog owners were not aware of and do not follow FDA pet food handling  
248 and storage guidelines. Response to individual recommendations varied, however hygiene-related handling practices  
249 (washing of hands, bowl and utensil) showed overall low levels of compliance. Additionally, studies in humans  
250 regarding self-reported handwashing show an overestimation of hygiene(8) and similar forces, including the effects  
251 of social desirability bias, could be expected in this study. Exposure to contaminated dog food can have implications  
252 for canine and human health. For example, there have been multiple outbreaks of both humans and dogs becoming  
253 ill after exposure to dog food contaminated with pathogenic bacteria(9). These risks may be amplified in households  
254 with children and/or immunocompromised individuals, which were over a third of respondents' households. The  
255 preponderance of pet food recalls has heightened the awareness of risk of illness. The CDC's examination of a 2008  
256 multi-state dog food recall found that the attack rate supported hypothesized transmission methods regarding pet  
257 food handling, including cross-contamination in the kitchen and irregular cleaning of dog food dishes(10). Although  
258 microbial contamination has been reported in kibble(10), the increasing prevalence of both commercial and  
259 homemade raw diets, which carry an increased risk of microbiological contamination such as *E. coli* and  
260 *Salmonella*(11), exacerbates these concerns. Weese's previously mentioned 2010 study showed dog bowls were 17  
261 times more likely to be contaminated with *Clostridium difficile* if the dog was fed a commercial raw food diet  
262 compared to other types of food(4). These diets can involve increased preparation within the kitchen environment,

263 which may further increase human exposure. Risks also exist outside of food contamination; the aforementioned  
264 study investigating household spread of drug resistant *E.coli* hypothesized that the bacteria found in one dog bowl  
265 originated from the pet's feces(2).

266

267 However, the risk of contamination of the household can be mitigated. We concluded that bacterial contamination is  
268 impacted by dish washing protocols due to the significant decrease in TAC for both Groups A and B, but not in  
269 Group C. Although this study did not differentiate between pathogenic and non-pathogenic bacterial species, TAC  
270 are commonly used in the food industry to determine the degree of sanitation. The CDC's cleaning and sanitization  
271 guidelines for human dishes are based on achieving a 5-log reduction in bacterial counts(12). The degree of  
272 contamination of bowls in this study did not allow for an assessment of sanitation by this definition; however, the  
273 significant reduction in TAC in both Group A and B showed a beneficial impact of following either protocol. As  
274 these protocols each had multiple steps, further studies identifying the best methods for sanitizing dishes are needed.  
275 However, as only 20% of Group A and B respondents reported they were likely to follow their hygiene instructions  
276 long-term, and only 8% reported likely to follow all given instructions, the need for recommendations that are  
277 feasible as well as effective should be emphasized. Studies should address potential concerns such as the effects of  
278 biofilms, influence of bowl degradation on contamination and the risk of cross-contamination in dishwashers. This is  
279 particularly true for pathogenic bacteria of high zoonotic potential. A 2006 study by Weese et al in which food  
280 dishes were inoculated with *Salmonella*-containing raw meat showed persistent infection in the majority of pet  
281 dishes after washing with routine measures including a dishwasher or with soap and water(13). Other studies have  
282 found dishwashers can disperse and harbor bacteria(14, 15). The effects of cross-contamination may extend beyond  
283 bacterial contamination when one considers that 9% of pet owners reported adding medications or supplements into  
284 their pets' food bowls.

285

286 The majority of respondents reported storing their pet food against FDA and most manufacturers' recommendations,  
287 which may have implications as far as increased microbial risk(16), nutritional degradation(17) and palatability. In  
288 addition, some respondents were engaging in behaviors that may increase risk of bacterial contamination that were  
289 not addressed in FDA guidelines such as the location of food preparation and storage. It is noted that the FDA has  
290 added more specific recommendations to their website regarding pet food storage and pet food recalls (website

291 updated 4/14/2020); however, it is not comprehensive in addressing pet owners' food preparation choices.  
292 Additionally, because survey respondents indicated low levels of awareness that the FDA was a source of such dog  
293 feeding hygiene recommendations, the expected sources of this information including the pet food label,  
294 veterinarians and pet food retailers, should consider prominently featuring these public health recommendations for  
295 their consumers. Further, it was noted Group C showed no significant change in TAC, despite the survey and the  
296 knowledge of the upcoming sample collection serving as potential introducers of bias. This suggests that education  
297 beyond awareness is needed to institute effective hygiene changes.

298  
299 Sample size was a limitation to this study, in particular for subgroups such as raw diets. Future studies should further  
300 examine contamination with specific pathogenic bacterial species and consider the contamination risk of other  
301 microbiological agents or toxins. Finally, further studies identifying ideal cleaning and storage recommendations as  
302 well as best practices to communicate these recommendations to consumers would help minimize risk of microbial  
303 growth in pet food after distribution as well as minimize health consequences to both pets and their human  
304 households.

305

#### 306 **Acknowledgments:**

307 James B. Robertson  
308 North Carolina State University  
309 College of Veterinary Medicine  
310 Raleigh, NC USA

311

312 Julie Nettifee, RVT  
313 North Carolina State University  
314 College of Veterinary Medicine  
315 Raleigh, NC USA

316

#### 317 **References**

318 1. CDC One Health Initiative [Internet].; 2021 [updated September 30,; cited 10/5/2021]. Available from:  
319 <https://www.cdc.gov/onehealth/index.html>.

- 320 2. Leite-Martins L, Meireles D, Beça N, Bessa LJ, de Matos, Augusto J. F., Martins da Costa P. Spread of  
321 multidrug-resistant *Escherichia coli* within domestic aggregates (humans, pets, and household environment). *Journal*  
322 *of Veterinary Behavior*. 2015;10(6):549-55.
- 323 3. Scott E, Duty S, McCue K. A critical evaluation of methicillin-resistant *Staphylococcus aureus* and other bacteria  
324 of medical interest on commonly touched household surfaces in relation to household demographics. *American*  
325 *Journal of Infection Control*. 2009;37(6):447-53.
- 326 4. J S WEESE, R FINLEY, R R REID-SMITH, N JANECKO, J ROUSSEAU. Evaluation of *Clostridium difficile* in  
327 dogs and the household environment. *Epidemiology and Infection*. 2010 Aug 1;138(8):1100-4.
- 328 5. Donofrio RS, Bechanko R, Hitt N, O'Malley K, Charnauski T, Bestervelt LL, et al. Are we aware of microbial  
329 hotspots in our household? *J Environ Health*. 2012 September 01;75(2):12-9.
- 330 6. FDA Tips for Safe Handling of Pet Food and Treats [Internet].; 2019 [updated 7/9/2019]. Available from:  
331 <https://www.fda.gov/animal-veterinary/animal-health-literacy/proper-storage-pet-food-treats>.
- 332 7. FDA Food Code 2017 [Internet].; 2017. Available from: [https://www.fda.gov/food/fda-food-code/food-code-](https://www.fda.gov/food/fda-food-code/food-code-2017)  
333 [2017](https://www.fda.gov/food/fda-food-code/food-code-2017).
- 334 8. Contzen N, De Pasquale S, Mosler HJ. Over-Reporting in Handwashing Self-Reports: Potential Explanatory  
335 Factors and Alternative Measurements. *PLoS One*. 2015 August 24;10(8):e0136445.
- 336 9. Bischoff K, Rumbeiha WK. Pet Food Recalls and Pet Food Contaminants in Small Animals: An Update. *Vet Clin*  
337 *North Am Small Anim Pract*. 2018 November 01;48(6):917-31.
- 338 10. Centers for Disease Control and Prevention, (CDC). Update: recall of dry dog and cat food products associated  
339 with human *Salmonella* Schwarzengrund infections--United States, 2008. *MMWR Morb Mortal Wkly Rep*. 2008  
340 November 07;57(44):1200-2.
- 341 11. Strohmeyer RA, Morley PS, Hyatt DR, Dargatz DA, Scorza AV, Lappin MR. Evaluation of bacterial and  
342 protozoal contamination of commercially available raw meat diets for dogs. *J Am Vet Med Assoc*. 2006 February  
343 15;228(4):537-42.
- 344 12. CDC Guideline for Disinfection and Sterilization in Healthcare Facilities, 2008 [Internet].; 2018. Available  
345 from: <https://www.cdc.gov/infectioncontrol/pdf/guidelines/disinfection-guidelines-H.pdf>.
- 346 13. Weese JS, Rousseau J. Survival of *Salmonella* Copenhagen in food bowls following contamination with  
347 experimentally inoculated raw meat: Effects of time, cleaning, and disinfection. *CANADIAN VETERINARY*  
348 *JOURNAL-REVUE VETERINAIRE CANADIENNE*. 2006;47(9):887-9.
- 349 14. Stahl Wernersson E, Johansson E, Hakanson H. Cross-contamination in dishwashers. *J Hosp Infect*. 2004 April  
350 01;56(4):312-7.
- 351 15. Zupancic J, Turk M, Crnigoj M, Ambrozic Avgustin J, Gunde-Cimerman N. The dishwasher rubber seal acts as  
352 a reservoir of bacteria in the home environment. *BMC Microbiol*. 2019 December 19;19(1):300-5.
- 353 16. Kiel RC, Martin JN, Woerner DR, Murphy R, Geornaras I, Levey JR, et al. Influence of Storage Temperature,  
354 Moisture Content, and Physical Impurities on the Distribution and Survival of *Salmonella enterica* in Poultry Fat  
355 Intended for Pet Food Use. *J Food Prot*. 2018 August 01;81(8):1364-72.
- 356 17. Hołda K, Głogowski R. Selected quality properties of lipid fraction and oxidative stability of dry dog foods  
357 under typical storage conditions. *Journal of Thermal Analysis and Calorimetry*. 2016 Oct;126(1):91-6.

# Figure 1: Food type used in average 24-hour period

bioRxiv preprint doi: <https://doi.org/10.1101/2021.10.21.465279>; this version posted October 21, 2021. The copyright holder for this preprint (which was not certified by peer review) is the author/funder, who has granted bioRxiv a license to display the preprint in perpetuity. It is made available under aCC-BY 4.0 International license.

## Comparison of food type between all survey respondents and respondents of those participating in the TAC assessment

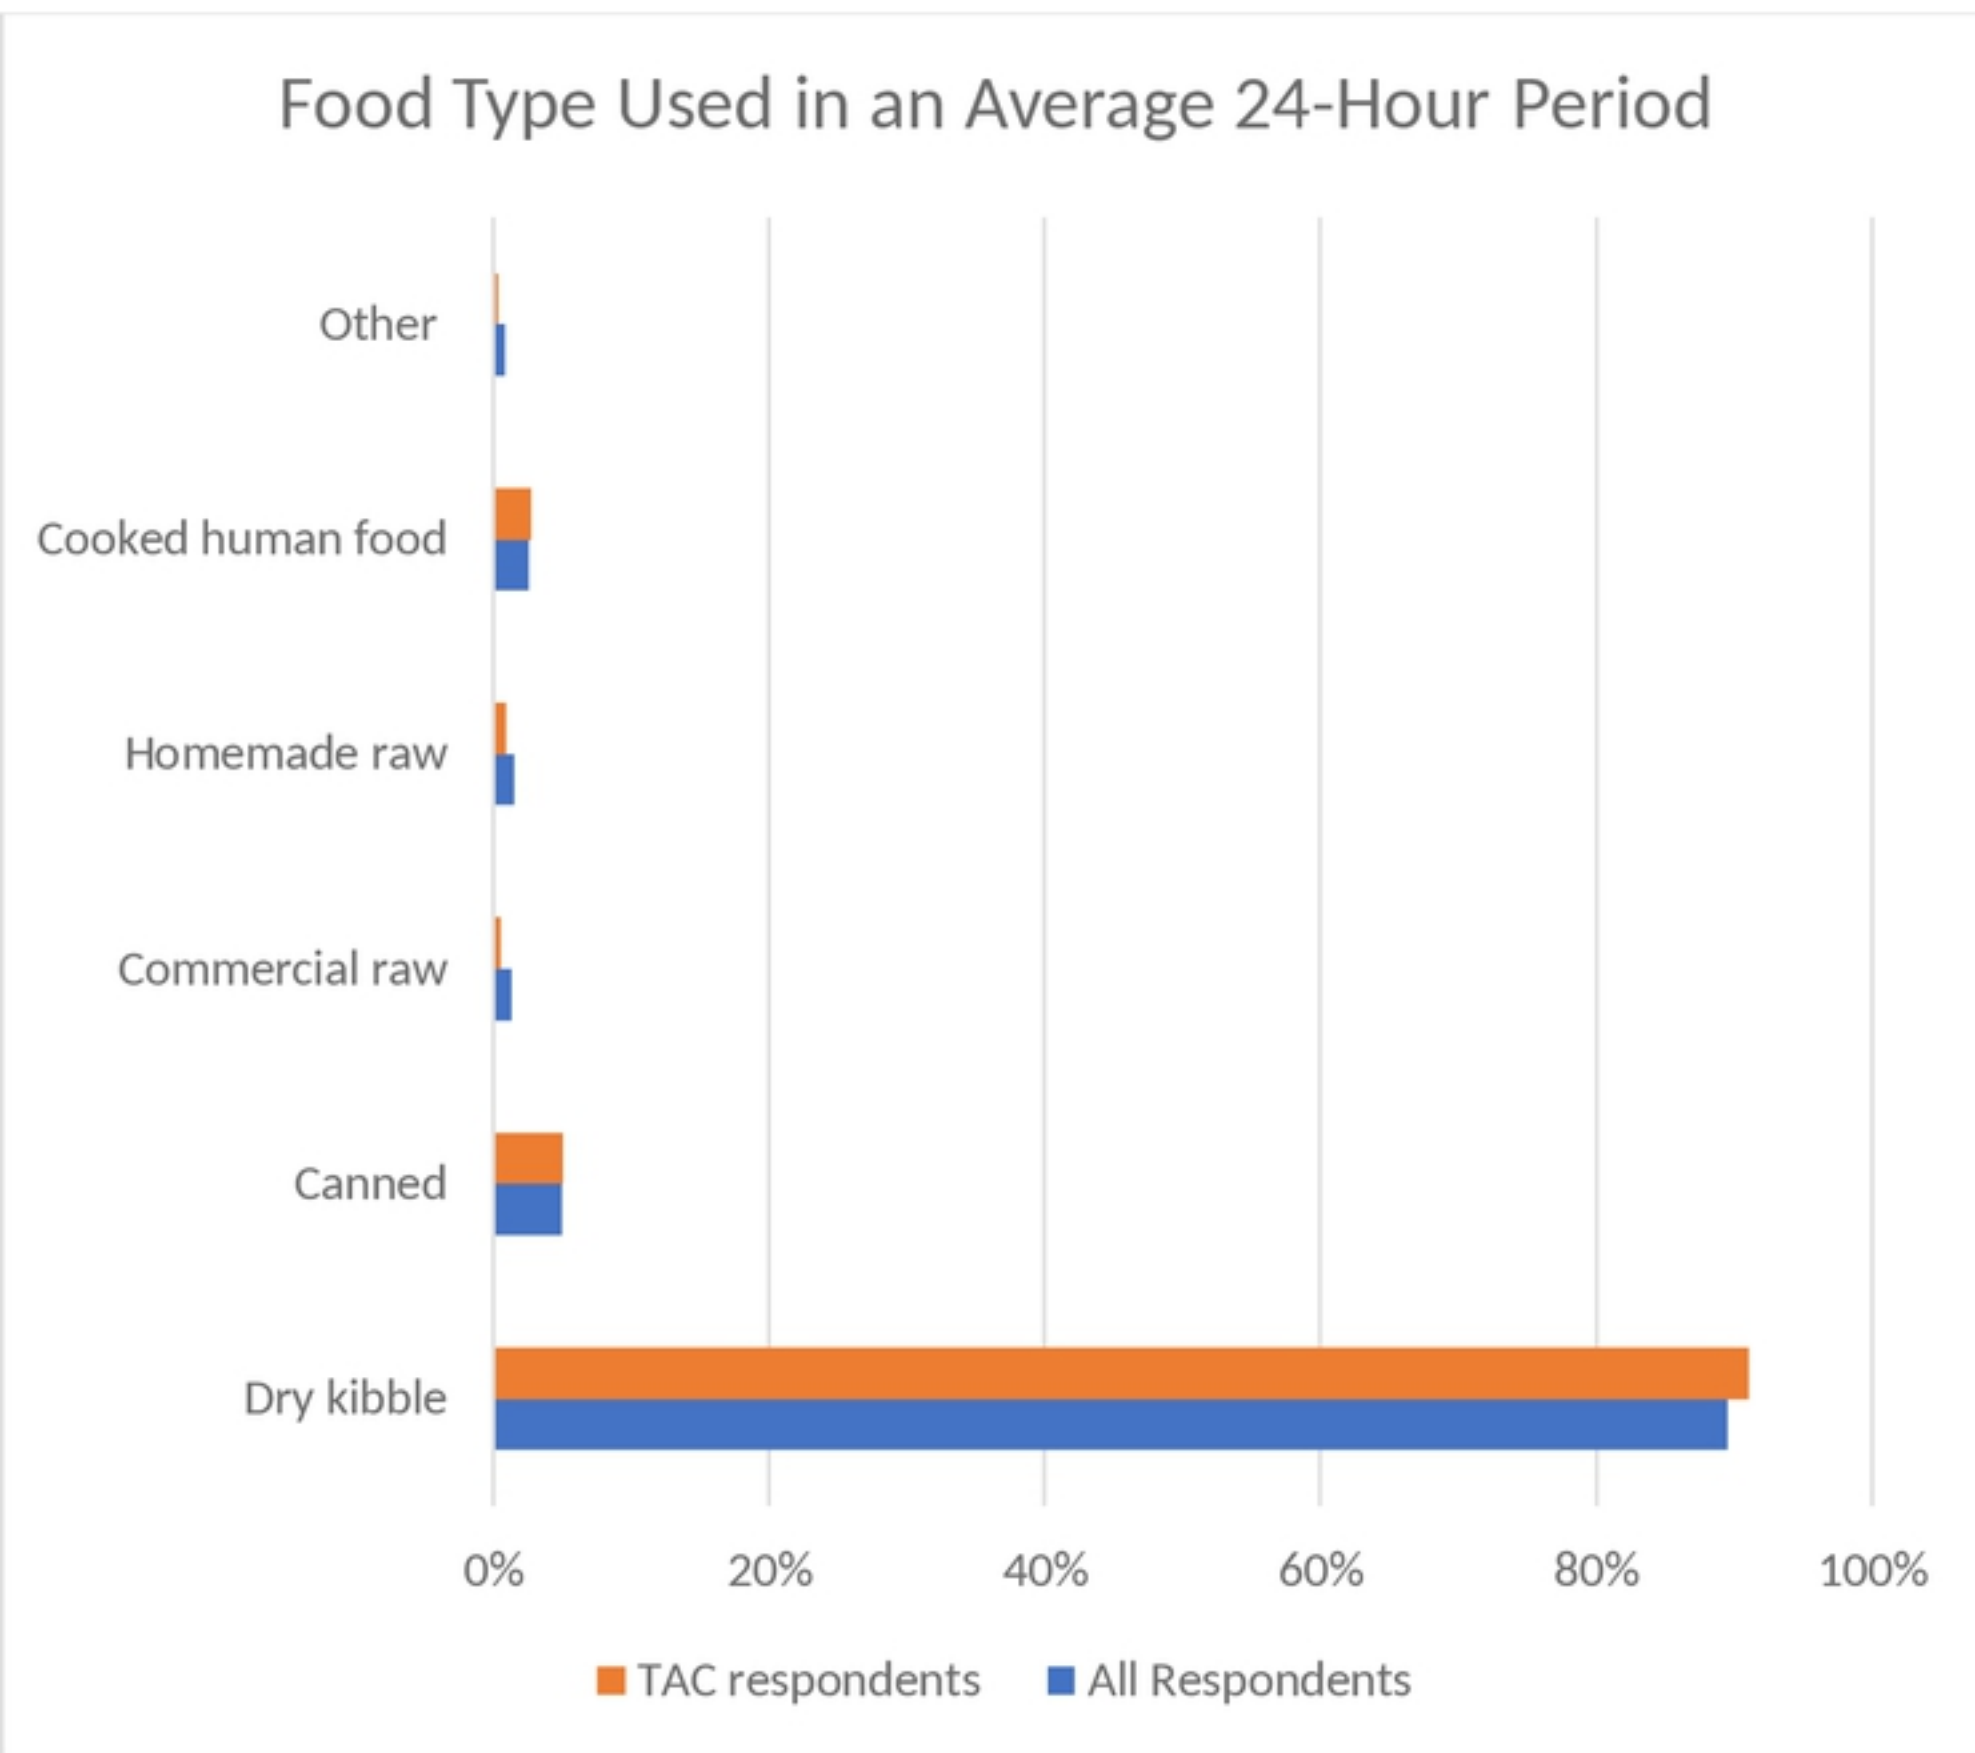

Figure 1

**Figure 2: Food bowl material**

Comparison of bowl type between all survey respondents and respondents of those participating in the TAC assessment

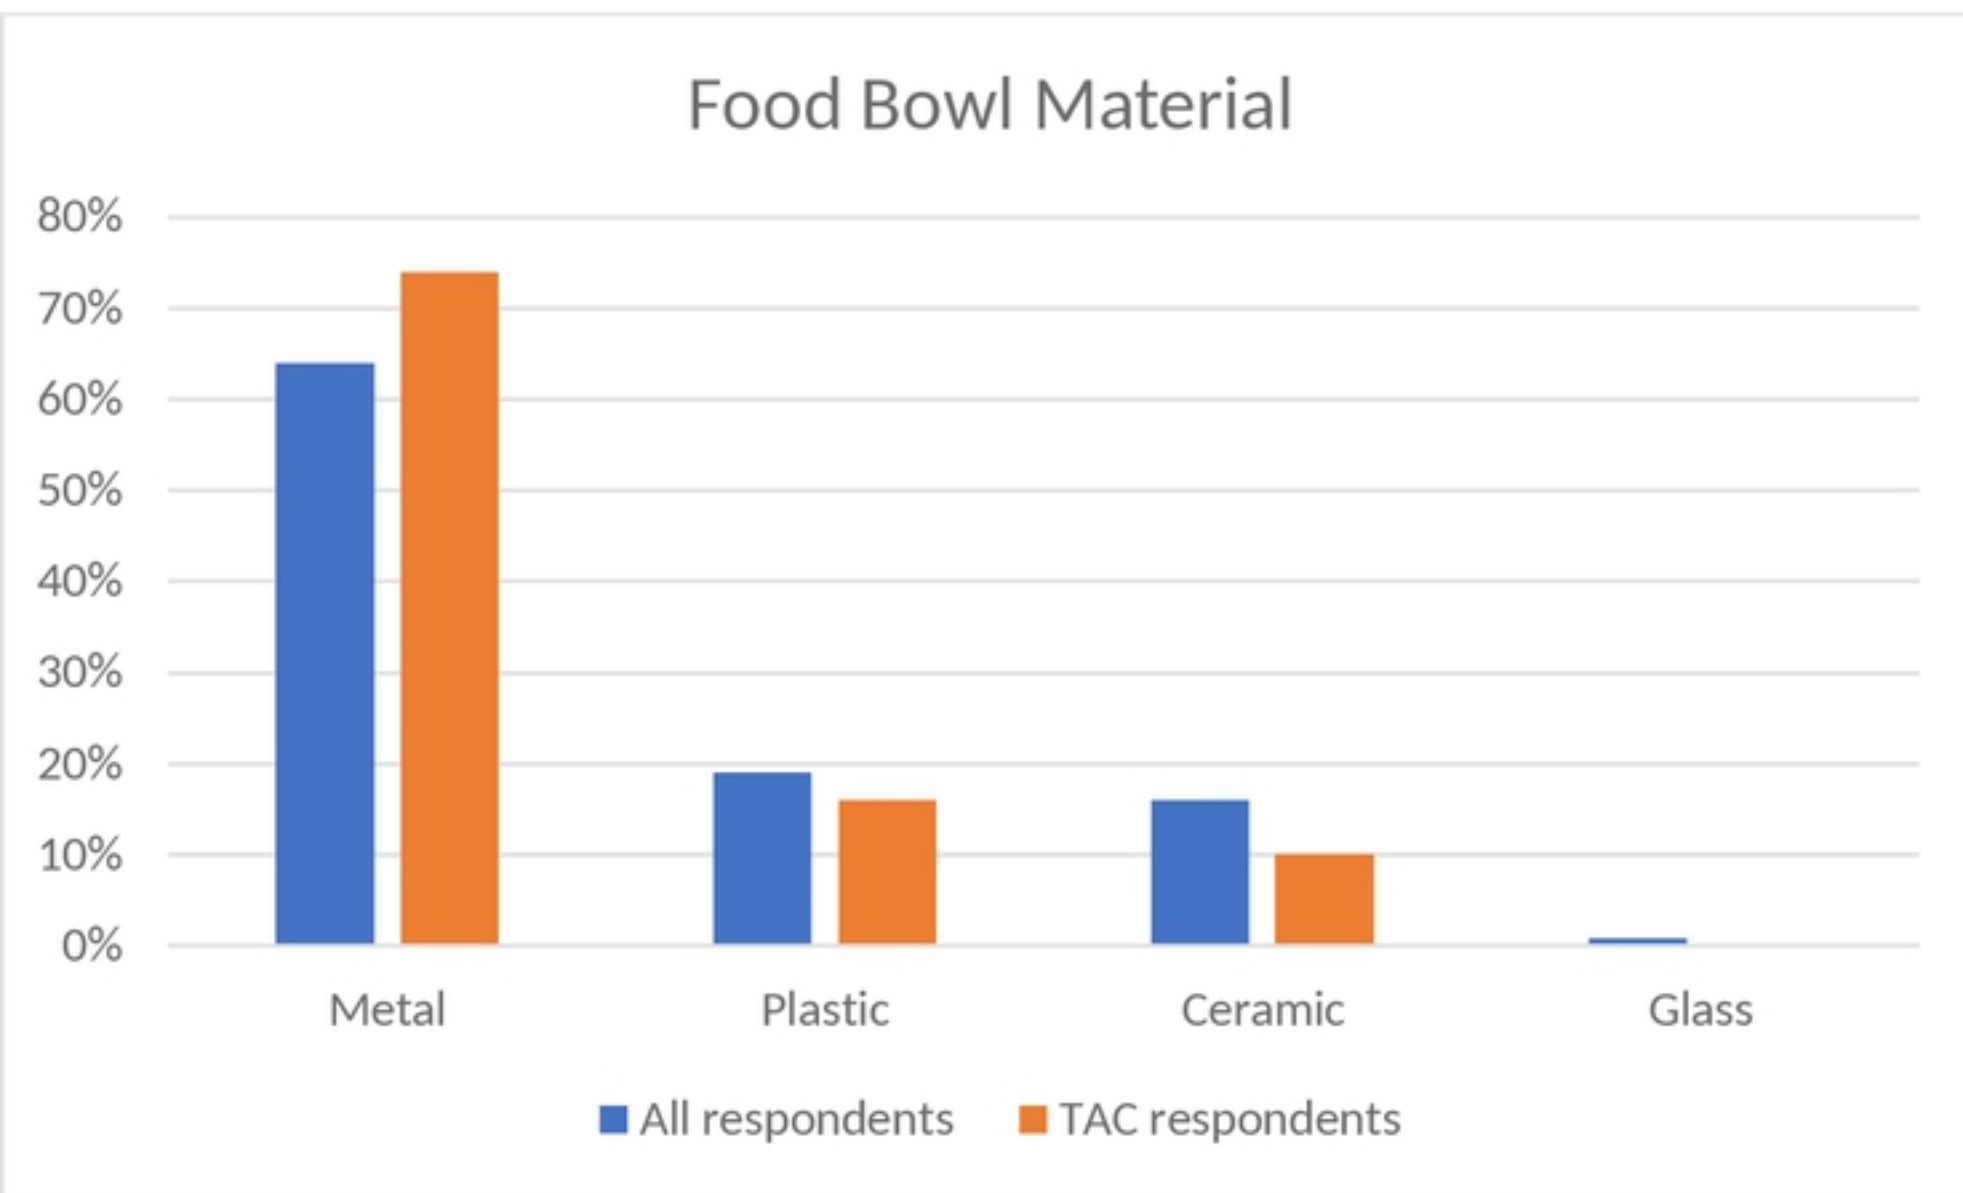

Figure 2



**Figure 3: Comparison of the Total Aerobic Counts in Studied Dog Bowls Pre- and Post- hygiene treatment**  
TAC on a basis of colony forming units (CFUs) per cm<sup>2</sup> of studied bowls pre- and post-hygiene treatment  
Superscripts that differ within a group indicated significant difference ( $p < 0.05$ ). Similar superscripts across groups indicate no significant difference ( $p < 0.05$ )

bioRxiv preprint doi: <https://doi.org/10.1101/2021.10.21.465279>; this version posted October 21, 2021. The copyright holder for this preprint (which was not certified by peer review) is the author/funder, who has granted bioRxiv a license to display the preprint in perpetuity. It is made available under a [CC-BY 4.0 International license](https://creativecommons.org/licenses/by/4.0/).

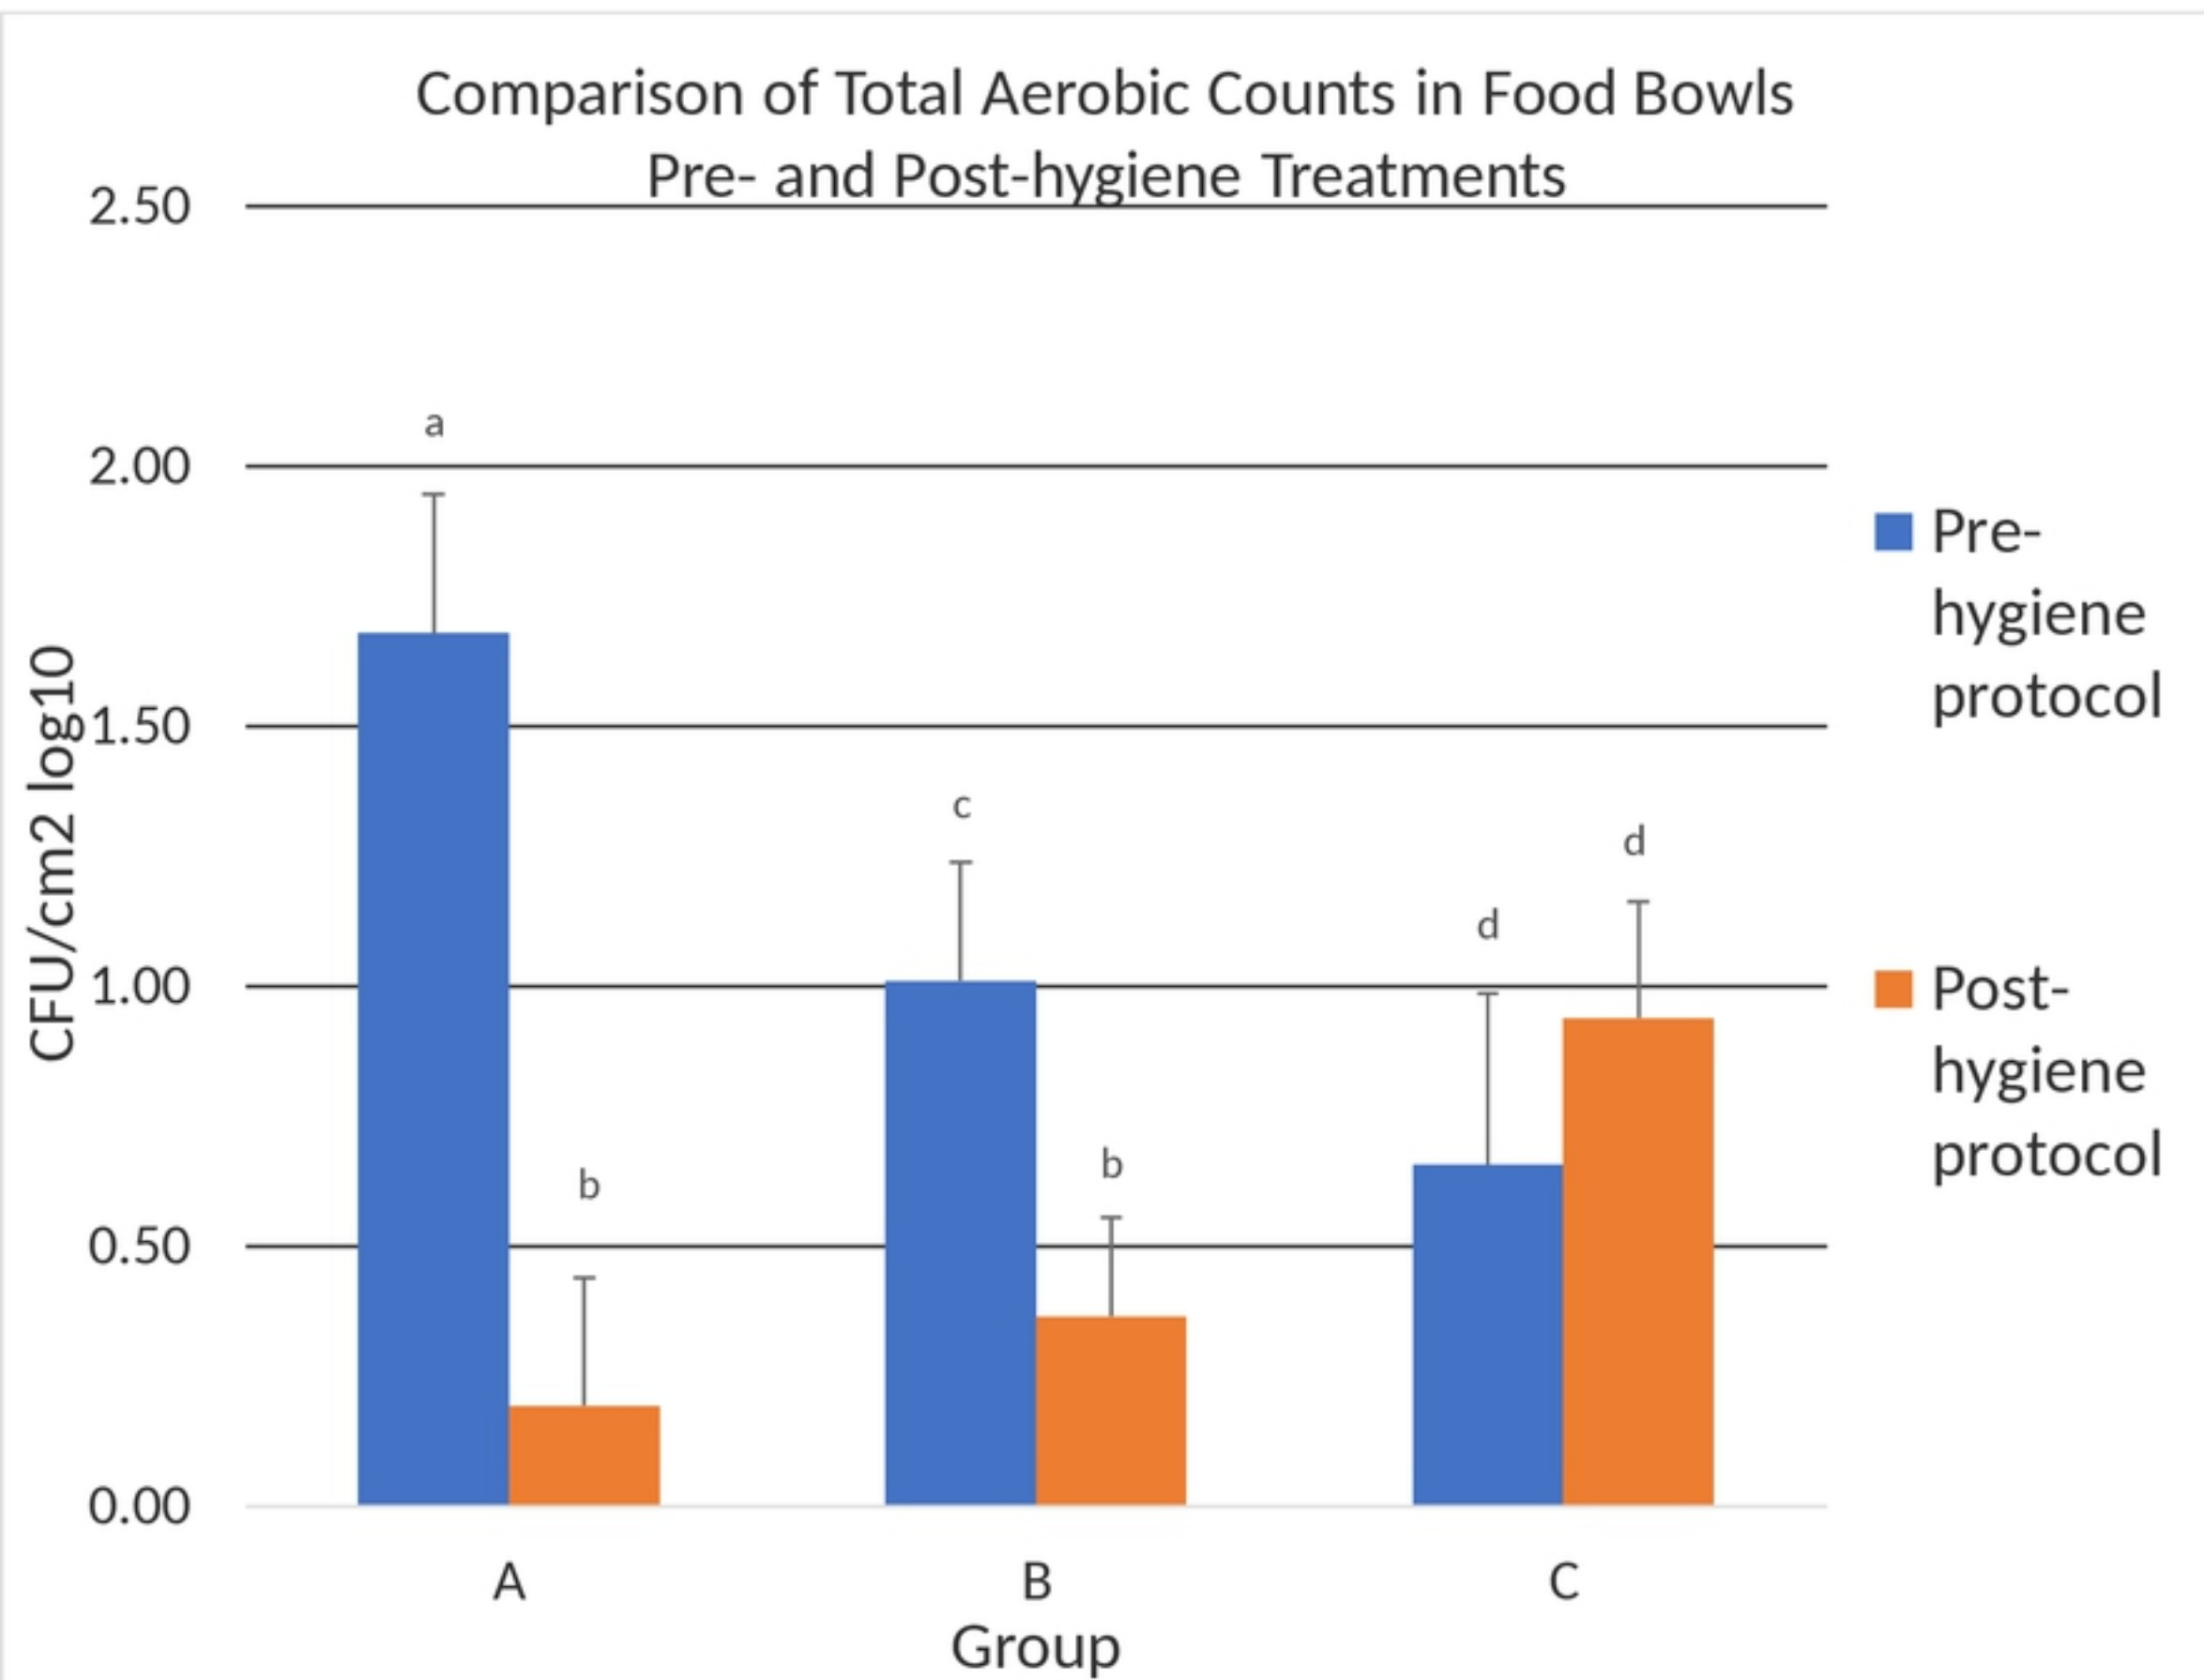

Figure 3
